# Supplementary material
Source: PubMed Central journal article supplement (PMC4479112)
Supplement: supp_kwu487_kwu487supp.pdf [file supp_kwu487_kwu487supp.pdf]

**Web Table 1.** Parental Age and Risk of Hematological Malignancy Subtypes in the Cancer Prevention Study-II, 1992-2009<sup>a</sup>

| Women                        |                 |                 |            |               |                 |            |               |                 |            |               |                 |            |               |                 |            |               |                 |            |               |                 |            |
|------------------------------|-----------------|-----------------|------------|---------------|-----------------|------------|---------------|-----------------|------------|---------------|-----------------|------------|---------------|-----------------|------------|---------------|-----------------|------------|---------------|-----------------|------------|
| Variable                     | All Lymphoid    |                 |            | DLBCL         |                 |            | FL            |                 |            | CLL/SLL       |                 |            | MM            |                 |            | All Myeloid   |                 |            | AML           |                 |            |
|                              | Cases (n=931)   | HR              | 95% CI     | Cases (n=190) | HR              | 95% CI     | Cases (n=142) | HR              | 95% CI     | Cases (n=214) | HR              | 95% CI     | Cases (n=158) | HR              | 95% CI     | Cases (n=128) | HR              | 95% CI     | Cases (n=85)  | HR              | 95% CI     |
| Paternal age at birth, years |                 |                 |            |               |                 |            |               |                 |            |               |                 |            |               |                 |            |               |                 |            |               |                 |            |
| <25 <sup>c</sup>             | 151             | 1.00            |            | 29            | 1.00            |            | 30            | 1.00            |            | 42            | 1.00            |            | 20            | 1.00            |            | 19            | 1.00            |            | 12            | 1.00            |            |
| 25-29                        | 241             | 0.88            | 0.71, 1.10 | 48            | 0.98            | 0.60, 1.60 | 41            | 0.66            | 0.39, 1.12 | 51            | 0.65            | 0.42, 1.01 | 42            | 1.20            | 0.68, 2.12 | 38            | 1.17            | 0.65, 2.10 | 26            | 1.29            | 0.63, 2.67 |
| 30-34                        | 258             | 1.04            | 0.82, 1.33 | 56            | 1.44            | 0.85, 2.43 | 40            | 0.57            | 0.31, 1.05 | 57            | 0.80            | 0.49, 1.31 | 41            | 1.33            | 0.71, 2.49 | 27            | 0.95            | 0.48, 1.88 | 17            | 0.99            | 0.42, 2.33 |
| 35+                          | 281             | 0.99            | 0.75, 1.30 | 57            | 1.51            | 0.83, 2.73 | 31            | 0.37            | 0.18, 0.76 | 64            | 0.77            | 0.44, 1.36 | 55            | 1.47            | 0.74, 2.94 | 44            | 1.48            | 0.71, 3.07 | 30            | 1.54            | 0.62, 3.84 |
| Continuous, per 5 years      |                 | 1.01            | 0.94, 1.08 |               | 1.11            | 0.96, 1.29 |               | 0.88            | 0.72, 1.07 |               | 0.97            | 0.83, 1.13 |               | 1.06            | 0.90, 1.25 |               | 1.07            | 0.89, 1.28 |               | 1.01            | 0.80, 1.28 |
| Maternal age at birth, years |                 |                 |            |               |                 |            |               |                 |            |               |                 |            |               |                 |            |               |                 |            |               |                 |            |
| <25 <sup>c</sup>             | 313             | 1.00            |            | 67            | 1.00            |            | 50            | 1.00            |            | 74            | 1.00            |            | 50            | 1.00            |            | 45            | 1.00            |            | 30            | 1.00            |            |
| 25-29                        | 267             | 0.93            | 0.77, 1.12 | 60            | 0.88            | 0.59, 1.30 | 39            | 1.11            | 0.68, 1.81 | 63            | 1.04            | 0.70, 1.54 | 44            | 0.87            | 0.55, 1.37 | 35            | 0.81            | 0.50, 1.34 | 23            | 0.79            | 0.43, 1.45 |
| 30-34                        | 207             | 0.93            | 0.74, 1.17 | 37            | 0.62            | 0.38, 1.03 | 37            | 1.71            | 0.96, 3.05 | 43            | 0.90            | 0.55, 1.47 | 35            | 0.86            | 0.50, 1.49 | 29            | 0.85            | 0.46, 1.56 | 17            | 0.76            | 0.36, 1.63 |
| 35+                          | 144             | 0.83            | 0.63, 1.09 | 26            | 0.54            | 0.29, 0.98 | 16            | 1.21            | 0.55, 2.66 | 34            | 0.91            | 0.51, 1.63 | 29            | 0.84            | 0.44, 1.60 | 19            | 0.59            | 0.28, 1.22 | 15            | 0.71            | 0.29, 1.70 |
| Continuous, per 5 years      |                 | 0.96            | 0.89, 1.05 |               | 0.87            | 0.73, 1.04 |               | 1.02            | 0.82, 1.28 |               | 0.98            | 0.82, 1.17 |               | 0.96            | 0.79, 1.16 |               | 0.89            | 0.71, 1.10 |               | 0.95            | 0.72, 1.25 |
| Men                          |                 |                 |            |               |                 |            |               |                 |            |               |                 |            |               |                 |            |               |                 |            |               |                 |            |
| Variable                     | All Lymphoid    |                 |            | DLBCL         |                 |            | FL            |                 |            | CLL/SLL       |                 |            | MM            |                 |            | All Myeloid   |                 |            | AML           |                 |            |
|                              | Cases (n=1,140) | HR              | 95% CI     | Cases (n=220) | HR              | 95% CI     | Cases (n=129) | HR              | 95% CI     | Cases (n=270) | HR              | 95% CI     | Cases (n=218) | HR              | 95% CI     | Cases (n=194) | HR              | 95% CI     | Cases (n=137) | HR              | 95% CI     |
| Paternal age at birth, years |                 |                 |            |               |                 |            |               |                 |            |               |                 |            |               |                 |            |               |                 |            |               |                 |            |
| <25 <sup>c</sup>             | 144             | 1.00            |            | 33            | 1.00            |            | 18            | 1.00            |            | 30            | 1.00            |            | 28            | 1.00            |            | 27            | 1.00            |            | 16            | 1.00            |            |
| 25-29                        | 359             | 1.41            | 1.15, 1.74 | 59            | 0.93            | 0.59, 1.48 | 45            | 1.47            | 0.82, 2.63 | 85            | 1.57            | 1.01, 2.44 | 70            | 1.39            | 0.87, 2.22 | 39            | 0.74            | 0.43, 1.25 | 28            | 0.92            | 0.48, 1.79 |
| 30-34                        | 281             | 1.23            | 0.97, 1.55 | 56            | 0.93            | 0.55, 1.56 | 29            | 1.06            | 0.54, 2.11 | 66            | 1.31            | 0.80, 2.17 | 57            | 1.13            | 0.66, 1.94 | 50            | 1.01            | 0.57, 1.78 | 36            | 1.22            | 0.60, 2.47 |
| 35+                          | 356             | 1.40            | 1.08, 1.81 | 72            | 1.12            | 0.64, 1.97 | 37            | 1.30            | 0.62, 2.75 | 89            | 1.54            | 0.90, 2.65 | 63            | 1.04            | 0.57, 1.90 | 78            | 1.37            | 0.75, 2.52 | 57            | 1.69            | 0.80, 3.58 |
| Continuous, per 5 years      |                 | 1.05            | 0.98, 1.11 |               | 1.03            | 0.90, 1.19 |               | 1.03            | 0.85, 1.24 |               | 1.00            | 0.87, 1.14 |               | 0.97            | 0.83, 1.12 |               | 1.07            | 0.92, 1.24 |               | 1.08            | 0.91, 1.29 |
| Maternal age at birth, years |                 |                 |            |               |                 |            |               |                 |            |               |                 |            |               |                 |            |               |                 |            |               |                 |            |
| <25 <sup>c</sup>             | 304             | 1.00            |            | 68            | 1.00            |            | 47            | 1.00            |            | 83            | 1.00            |            | 70            | 1.00            |            | 52            | 1.00            |            | 35            | 1.00            |            |
| 25-29                        | 255             | 0.88            | 0.74, 1.03 | 68            | 1.09            | 0.74, 1.61 | 38            | 0.82            | 0.51, 1.31 | 81            | 0.93            | 0.66, 1.30 | 62            | 0.90            | 0.61, 1.32 | 56            | 1.10            | 0.71, 1.72 | 37            | 1.00            | 0.59, 1.70 |
| 30-34                        | 201             | 0.90            | 0.73, 1.10 | 52            | 1.08            | 0.68, 1.73 | 28            | 0.89            | 0.49, 1.62 | 61            | 0.98            | 0.65, 1.49 | 53            | 1.19            | 0.75, 1.89 | 48            | 1.10            | 0.66, 1.84 | 38            | 1.19            | 0.65, 2.16 |
| 35+                          | 175             | 0.79            | 0.62, 1.01 | 32            | 0.80            | 0.45, 1.41 | 16            | 0.63            | 0.29, 1.34 | 45            | 0.90            | 0.55, 1.48 | 33            | 1.01            | 0.57, 1.81 | 38            | 0.95            | 0.53, 1.71 | 27            | 0.92            | 0.46, 1.84 |
| Continuous, per 5 years      |                 | 0.95            | 0.89, 1.03 |               | 0.97            | 0.82, 1.14 |               | 0.89            | 0.71, 1.11 |               | 1.08            | 0.93, 1.26 |               | 1.04            | 0.87, 1.23 |               | 1.06            | 0.89, 1.26 |               | 1.07            | 0.87, 1.31 |
| All Participants             |                 |                 |            |               |                 |            |               |                 |            |               |                 |            |               |                 |            |               |                 |            |               |                 |            |
| Variable                     | All Lymphoid    |                 |            | DLBCL         |                 |            | FL            |                 |            | CLL/SLL       |                 |            | MM            |                 |            | All Myeloid   |                 |            | AML           |                 |            |
|                              | Cases (n=2,071) | HR <sup>b</sup> | 95% CI     | Cases (n=410) | HR <sup>b</sup> | 95% CI     | Cases (n=271) | HR <sup>b</sup> | 95% CI     | Cases (n=484) | HR <sup>b</sup> | 95% CI     | Cases (n=376) | HR <sup>b</sup> | 95% CI     | Cases (n=322) | HR <sup>b</sup> | 95% CI     | Cases (n=222) | HR <sup>b</sup> | 95% CI     |
| Paternal age at birth, years |                 |                 |            |               |                 |            |               |                 |            |               |                 |            |               |                 |            |               |                 |            |               |                 |            |
| <25 <sup>c</sup>             | 295             | 1.00            |            | 62            | 1.00            |            | 48            | 1.00            |            | 72            | 1.00            |            | 48            | 1.00            |            | 46            | 1.00            |            | 28            | 1.00            |            |
| 25-29                        | 600             | 1.14            | 0.98, 1.33 | 107           | 0.95            | 0.68, 1.34 | 86            | 0.96            | 0.66, 1.41 | 136           | 1.03            | 0.76, 1.40 | 112           | 1.31            | 0.92, 1.88 | 77            | 0.91            | 0.61, 1.35 | 54            | 1.08            | 0.66, 1.75 |
| 30-34                        | 539             | 1.13            | 0.96, 1.34 | 112           | 1.15            | 0.79, 1.66 | 69            | 0.77            | 0.49, 1.21 | 123           | 1.02            | 0.72, 1.44 | 98            | 1.21            | 0.81, 1.82 | 77            | 0.99            | 0.64, 1.54 | 53            | 1.14            | 0.66, 1.96 |
| 35+                          | 637             | 1.19            | 0.98, 1.43 | 129           | 1.29            | 0.86, 1.94 | 68            | 0.68            | 0.40, 1.13 | 153           | 1.10            | 0.75, 1.61 | 118           | 1.20            | 0.77, 1.89 | 122           | 1.42            | 0.89, 2.26 | 87            | 1.64            | 0.93, 2.92 |
| Continuous, per 5 years      |                 | 1.03            | 0.98, 1.08 |               | 1.07            | 0.96, 1.18 |               | 0.95            | 0.83, 1.09 |               | 0.99            | 0.89, 1.09 |               | 1.00            | 0.90, 1.12 |               | 1.07            | 0.95, 1.20 |               | 1.06            | 0.92, 1.21 |
| Maternal age at birth, years |                 |                 |            |               |                 |            |               |                 |            |               |                 |            |               |                 |            |               |                 |            |               |                 |            |
| <25                          | 689             | 1.00            |            | 135           | 1.00            |            | 97            | 1.00            |            | 157           | 1.00            |            | 120           | 1.00            |            | 97            | 1.00            |            | 65            | 1.00            |            |
| 25-29                        | 607             | 0.90            | 0.80, 1.02 | 128           | 0.98            | 0.74, 1.29 | 77            | 0.95            | 0.67, 1.33 | 144           | 0.97            | 0.75, 1.26 | 106           | 0.89            | 0.66, 1.19 | 91            | 0.97            | 0.70, 1.35 | 60            | 0.91            | 0.61, 1.35 |
| 30-34                        | 456             | 0.91            | 0.79, 1.06 | 89            | 0.84            | 0.60, 1.18 | 65            | 1.25            | 0.82, 1.89 | 104           | 0.95            | 0.69, 1.30 | 88            | 1.04            | 0.73, 1.49 | 77            | 0.98            | 0.66, 1.45 | 55            | 1.00            | 0.63, 1.59 |
| 35+                          | 319             | 0.81            | 0.67, 0.97 | 58            | 0.66            | 0.44, 1.00 | 32            | 0.87            | 0.50, 1.50 | 79            | 0.90            | 0.62, 1.32 | 62            | 0.95            | 0.62, 1.46 | 57            | 0.79            | 0.50, 1.24 | 42            | 0.83            | 0.48, 1.42 |
| Continuous, per 5 years      |                 | 0.96            | 0.91, 1.01 |               | 0.92            | 0.82, 1.04 |               | 0.95            | 0.81, 1.12 |               | 1.03            | 0.92, 1.16 |               | 1.00            | 0.88, 1.14 |               | 0.99            | 0.86, 1.13 |               | 1.02            | 0.86, 1.20 |

Abbreviations: AML, acute myeloid leukemia; CI, confidence interval; CLL/SLL, chronic lymphocytic leukemia/small lymphocytic lymphoma; DLBCL, diffuse large B-cell lymphoma; FL, follicular lymphoma; HR, hazard ratio; MM, multiple myeloma.

<sup>a</sup> All models were adjusted for race, sibling status, education, age of the other parent at the time of participant's birth and stratified by age in years at cohort entry.

<sup>b</sup> The model was further adjusted for sex.

<sup>c</sup> Referent category.
